# Supplementary material for: Vaginal host immune-microbiome-metabolite interactions associated with spontaneous preterm birth in a predominantly white cohort
Source: Springer Nature journal article supplement (doi:10.1038/s41522-025-00671-4), 2025-03-26
Supplement: MOESM1 [file 41522_2025_671_MOESM1_ESM.pdf]

**Supplementary Table 1. Barcoded primer sequences**

|                     |                                                   |                        |                                                       |
|---------------------|---------------------------------------------------|------------------------|-------------------------------------------------------|
| <b>Forward</b>      | 319F<br>CTCCTACGGGAGGCAGCAGT                      | <b>Reverse</b>         | MCRRevA<br>CTCACGACACGAGCTGACGAC                      |
| <b>Primer Name</b>  | <b>Primer Sequence + Barcode</b>                  | <b>Primer Name</b>     | <b>Primer Sequence + Barcode</b>                      |
| 16S_319F_B<br>C01_F | AAGAAAGTTGTCGGTGTCTTTGTG<br>CTCCTACGGGAGGCAGCAGT  | 16S_MCRRevA_<br>BC01_R | AAGAAAGTTGTCGGTGTCTTTGT<br>GCTCACGACACGAGCTGACGAC     |
| 16S_319F_B<br>C02_F | TCGATTCCGTTTGTAGTCGTCTGT<br>CTCCTACGGGAGGCAGCAGT  | 16S_MCRRevA_<br>BC02_R | TCGATTCCGTTTGTAGTCGTCTGT<br>TCTCACGACACGAGCTGACGAC    |
| 16S_319F_B<br>C03_F | GAGTCTTGTGTCCAGTTACCAGG<br>CTCCTACGGGAGGCAGCAGT   | 16S_MCRRevA_<br>BC03_R | GAGTCTTGTGTCCAGTTACCAG<br>GCTCACGACACGAGCTGACGAC      |
| 16S_319F_B<br>C04_F | TTCGGATTCTATCGTGTTTCCCTA<br>CTCCTACGGGAGGCAGCAGT  | 16S_MCRRevA_<br>BC04_R | TTCGGATTCTATCGTGTTTCCCT<br>ACTCACGACACGAGCTGACGAC     |
| 16S_319F_B<br>C05_F | CTTGTCCAGGGTTTGTGTAAACCTT<br>CTCCTACGGGAGGCAGCAGT | 16S_MCRRevA_<br>BC05_R | CTTGTCCAGGGTTTGTGTAAACCT<br>TCTCACGACACGAGCTGACGAC    |
| 16S_319F_B<br>C06_F | TTCTCGCAAAGGCAGAAAGTAGT<br>CCTCTACGGGAGGCAGCAGT   | 16S_MCRRevA_<br>BC06_R | TTCTCGCAAAGGCAGAAAGTAG<br>TCCTCACGACACGAGCTGACGA<br>C |
| 16S_319F_B<br>C07_F | GTGTTACCGTGGAATGAATCCTT<br>CTCCTACGGGAGGCAGCAGT   | 16S_MCRRevA_<br>BC07_R | GTGTTACCGTGGAATGAATCC<br>TTCTCACGACACGAGCTGACGA<br>C  |
| 16S_319F_B<br>C08_F | TTCAGGGAACAAACCAAGTTACG<br>TCTCTACGGGAGGCAGCAGT   | 16S_MCRRevA_<br>BC08_R | TTCAGGGAACAAACCAAGTTAC<br>GTCTCACGACACGAGCTGACGA<br>C |
| 16S_319F_B<br>C09_F | AACTAGGCACAGCGAGTCTTGGTT<br>CTCCTACGGGAGGCAGCAGT  | 16S_MCRRevA_<br>BC09_R | AACTAGGCACAGCGAGTCTTGG<br>TTCTCACGACACGAGCTGACGA<br>C |
| 16S_319F_B<br>C10_F | AAGCGTTGAAACCTTTGTCCTCTC<br>CTCCTACGGGAGGCAGCAGT  | 16S_MCRRevA_<br>BC10_R | AAGCGTTGAAACCTTTGTCCTCT<br>CCTCACGACACGAGCTGACGAC     |
| 16S_319F_B<br>C11_F | GTTTCATCTATCGGAGGGAATGGA<br>CTCCTACGGGAGGCAGCAGT  | 16S_MCRRevA_<br>BC11_R | GTTTCATCTATCGGAGGGAATG<br>GACTCACGACACGAGCTGACGA<br>C |
| 16S_319F_B<br>C12_F | CAGGTAGAAAGAAGCAGAATCGG<br>ACTCTACGGGAGGCAGCAGT   | 16S_MCRRevA_<br>BC12_R | CAGGTAGAAAGAAGCAGAATCG<br>GACTCACGACACGAGCTGACGA<br>C |
| 16S_319F_B<br>C13_F | AGAACGACTTCCATACTCGTGTGA<br>CTCCTACGGGAGGCAGCAGT  | 16S_MCRRevA_<br>BC13_R | AGAACGACTTCCATACTCGTGT<br>GACTCACGACACGAGCTGACGA<br>C |
| 16S_319F_B<br>C14_F | AACGAGTCTCTTGGGACCCATAG<br>ACTCTACGGGAGGCAGCAGT   | 16S_MCRRevA_<br>BC14_R | AACGAGTCTCTTGGGACCCATA<br>GACTCACGACACGAGCTGACGA<br>C |
| 16S_319F_B<br>C15_F | AGGTCTACCTCGCTAACACCACTG<br>CTCCTACGGGAGGCAGCAGT  | 16S_MCRRevA_<br>BC15_R | AGGTCTACCTCGCTAACACCAC<br>TGCTCACGACACGAGCTGACGA<br>C |
| 16S_319F_B          | CGTCAACTGACAGTGGTTCGTACT                          | 16S_MCRRevA_           | CGTCAACTGACAGTGGTTCGTA                                |

|                     |                                                   |                       |                                                    |
|---------------------|---------------------------------------------------|-----------------------|----------------------------------------------------|
| C16_F               | CTCCTACGGGAGGCAGCAGT                              | BC16_R                | CTCTCACGACACGAGCTGACGAC                            |
| 16S_319F_B<br>C17_F | ACCCTCCAGGAAAGTACCTCTGAT<br>CTCCTACGGGAGGCAGCAGT  | 16S_MCRevA_<br>BC17_R | ACCCTCCAGGAAAGTACCTCTG<br>ATCTCACGACACGAGCTGACGAC  |
| 16S_319F_B<br>C18_F | CCAAACCCAACAACCTAGATAGG<br>CCTCCTACGGGAGGCAGCAGT  | 16S_MCRevA_<br>BC18_R | CCAAACCCAACAACCTAGATAG<br>GCCTCACGACACGAGCTGACGAC  |
| 16S_319F_B<br>C19_F | GTTCCCTCGTGCAGTGTCAAGAGAT<br>CTCCTACGGGAGGCAGCAGT | 16S_MCRevA_<br>BC19_R | GTTCCCTCGTGCAGTGTCAAGAG<br>ATCTCACGACACGAGCTGACGAC |
| 16S_319F_B<br>C20_F | TTGCGTCCTGTTACGAGAACTCAT<br>CTCCTACGGGAGGCAGCAGT  | 16S_MCRevA_<br>BC20_R | TTGCGTCCTGTTACGAGAACTCA<br>TCTCACGACACGAGCTGACGAC  |
| 16S_319F_B<br>C21_F | GAGCCTCTCATTGTCCGTTCTCTA<br>CTCCTACGGGAGGCAGCAGT  | 16S_MCRevA_<br>BC21_R | GAGCCTCTCATTGTCCGTTCTCT<br>ACTCACGACACGAGCTGACGAC  |
| 16S_319F_B<br>C22_F | ACCACTGCCATGTATCAAAGTACG<br>CTCCTACGGGAGGCAGCAGT  | 16S_MCRevA_<br>BC22_R | ACCACTGCCATGTATCAAAGTA<br>CGCTCACGACACGAGCTGACGAC  |
| 16S_319F_B<br>C23_F | CTTACTACCCAGTGAACCTCCTCG<br>CTCCTACGGGAGGCAGCAGT  | 16S_MCRevA_<br>BC23_R | CTTACTACCCAGTGAACCTCCTC<br>GCTCACGACACGAGCTGACGAC  |
| 16S_319F_B<br>C24_F | GCATAGTTCTGCATGATGGGTTAG<br>CTCCTACGGGAGGCAGCAGT  | 16S_MCRevA_<br>BC24_R | GCATAGTTCTGCATGATGGGTT<br>AGCTCACGACACGAGCTGACGAC  |
| 16S_319F_B<br>C25_F | GTAAGTTGGGTATGCAACGCAAT<br>GCTCCTACGGGAGGCAGCAGT  | 16S_MCRevA_<br>BC25_R | GTAAGTTGGGTATGCAACGCAA<br>TGCTCACGACACGAGCTGACGAC  |
| 16S_319F_B<br>C26_F | CATACAGCGACTACGCATTCTCAT<br>CTCCTACGGGAGGCAGCAGT  | 16S_MCRevA_<br>BC26_R | CATACAGCGACTACGCATTCTC<br>ATCTCACGACACGAGCTGACGAC  |
| 16S_319F_B<br>C27_F | CGACGGTTAGATTACCTCTTACA<br>CTCCTACGGGAGGCAGCAGT   | 16S_MCRevA_<br>BC27_R | CGACGGTTAGATTACCTCTTAC<br>ACTCACGACACGAGCTGACGAC   |
| 16S_319F_B<br>C28_F | TGAAACCTAAGAAGGCACCGTAT<br>CCTCCTACGGGAGGCAGCAGT  | 16S_MCRevA_<br>BC28_R | TGAAACCTAAGAAGGCACCGTA<br>TCCTCACGACACGAGCTGACGAC  |
| 16S_319F_B<br>C29_F | CTAGACACCTTGGGTTGACAGACC<br>CTCCTACGGGAGGCAGCAGT  | 16S_MCRevA_<br>BC29_R | CTAGACACCTTGGGTTGACAGA<br>CCCTCACGACACGAGCTGACGAC  |
| 16S_319F_B<br>C30_F | TCAGTGAGGATCTACTTCGACCCA<br>CTCCTACGGGAGGCAGCAGT  | 16S_MCRevA_<br>BC30_R | TCAGTGAGGATCTACTTCGACC<br>CACTCACGACACGAGCTGACGAC  |
| 16S_319F_B<br>C31_F | TGCGTACAGCAATCAGTTACATTG<br>CTCCTACGGGAGGCAGCAGT  | 16S_MCRevA_<br>BC31_R | TGCGTACAGCAATCAGTTACAT<br>TGCTCACGACACGAGCTGACGAC  |
| 16S_319F_B<br>C32_F | CCAGTAGAAGTCCGACAACGTCA<br>TCTCCTACGGGAGGCAGCAGT  | 16S_MCRevA_<br>BC32_R | CCAGTAGAAGTCCGACAACGTC<br>ATCTCACGACACGAGCTGACGAC  |

|                     |                                                  |                      |                                                       |
|---------------------|--------------------------------------------------|----------------------|-------------------------------------------------------|
| 16S_319F_B<br>C33_F | CAGACTTGGTACGGTTGGGTA<br>ACTCTCCTACGGGAGGCAGCAGT | 16S_MCRvA_<br>BC33_R | CAGACTTGGTACGGTTGGGTAA<br>CTCTCACGACACGAGCTGACGA<br>C |
|---------------------|--------------------------------------------------|----------------------|-------------------------------------------------------|

## Supplementary Note 1

### Multiplexed bead-based immunoassay (Cytometric Bead Array)

#### *Preparation of the standards*

The BD CBA Human Enhanced Sensitivity Flex Set standards were prepared by pooling all lyophilized standard spheres into a 15 mL polypropylene tube, reconstituting with 4 mL of Assay Diluent and allowing the mixture to equilibrate at room temperature for 15 minutes. Ten 12 x 75 mm tubes were labelled and arranged in the following order: 0, 10, 20, 40, 80, 156, 312, 625, 1250 and 2500 (Top Standard). Then, 460 µL of Assay Diluent was transferred into the Top Standard tube without the reconstituted standard. 500 µL of Assay Diluent was transferred into the other nine 12 x 75 mm tubes. 25 µL of the reconstituted standards was transferred into the Top Standard tube and mixed by gentle vortexing for about 3 seconds. Serial dilution was performed by transferring 200 µL from the Top Standard tube into the dilution tube labelled 10, continuing serially up to the 1250 labelled dilution tube. The tube labelled as 0 containing only Assay Diluent was prepared as the 0 fg/mL negative control.

#### *Mixing the cytokine-specific capture beads in solution*

After diluting (thoroughly resuspending) the capture beads to their optimal concentration according to the number of tests in the experiment as indicated below, 25 µL of the capture bead solution was transferred into each tube of both unknown samples and standards. The tubes were gently mixed and incubated for one hour at room temperature. The incubation was performed in the absence of ultraviolet light, in order for the capture antibodies to adequately bind to the cytokines contained in each sample and standard.

Total volume of diluted beads needed:

*96 samples in total (GTP n=51, GTP n=45)+10 standard samples = 106. We tested 120 samples to avoid pipetting errors.*

*25 µL of diluted capture bead mix into each tube of both samples and standards, thus:*

***25 x 120 = 3000 µL total volume of beads***

*We have 6 beads, one for each cytokine (CXCL9, CXCL10, CXCL11, TNF-α, Eotaxin and TNFR1) and 0.5 µL for each bead per test sample.*

$$0.5 \times 120 = 60 \mu\text{L}$$

$$6 \text{ beads} \times 60 = 360 \mu\text{L volume of each beads tested}$$

$$\text{Volume of Capture Bead Diluent} = 3000 - 360 = 2640 \mu\text{L}$$

#### *Preparing Detection Reagents (Parts A and B)*

During the incubation time, Detection Reagent diluent provided with each BD CBA Human Enhanced Sensitivity Flex Set was prepared by calculating the total volume of the Detection Reagent (Part A) needed for the experiment, and subtracting the volume needed for each Human Detection Reagent to obtain the volume of the Detection Reagent diluent as indicated below:

*Volume of Detection Reagent diluent needed to dilute the Detection Reagent (Part A) = Total volume of diluted Detection Reagent required - volume needed for each Detection Reagent*

25 µL of the Mixed Human Detection Reagents (i.e. mixture of detection reagent (Part A) and diluent) were added into each sample tube and incubated further for another 1½ hour protected from light at room temperature to allow organometallic (sandwich) complexes to be formed.

The lyophilized Enhanced Sensitivity Detection Reagent (Part B) provided in the Human Enhanced Sensitivity Master Buffer Kit was prepared by reconstitution with 550 µL of the Detection Reagent diluent and incubated for 15 minutes at room temperature, away from light. 4.5 mL of the Detection Reagent diluent was transferred to a 15 mL conical polypropylene tube, followed by the transfer of 0.5 mL of the reconstituted Enhanced Sensitivity Detection Reagent (Part B) and mixed by gentle vortexing.

#### *Assay procedure*

Finally, the Human Enhanced Sensitivity Flex Set Assay was performed. The filter plate was washed with 100 µL of Wash Buffer and aspirated until drained. 50 µL of the standard dilutions were transferred to the first eight tubes, followed by the transfer of 25 µL of the unknown samples to the following tubes. 25 µL of capture beads were added into each assay tube, followed by 25 µL of the mixed Human Detection Reagent (Part A) and 100 µL of the Enhanced Sensitivity Detection Reagent (Part B). The tubes were incubated for 1 hour at room temperature

and centrifuged at  $200 \times g$  for 5 minutes, after adding 1 mL of Wash Buffer. The supernatant was then carefully aspirated and discarded safely.

The FCAP Array v1.0 software was used to generate mean fluorescence intensity (MFI) for both standards and CV fluid samples. A calibration curve was created with the fluorescence data (MFI) collected from the standard samples using the *RIA or ELISA - Interpolate unknowns from sigmoidal curve* function of GraphPad prism. Cytokine concentration in the samples were subsequently extrapolated from the standard curve. Uniformity of data was maintained by using the same procedure for each cytokine measurement, operated once with the same equipment and by the same operator.

## Supplementary Note 2

### **Correlation of microbiota, metabolite and chemokine/cytokine profiles at GTP1**

At GTP1, 14 CV fluid samples had both microbiota and metabolome data and we observed some correlations between the CSTs and most abundant metabolites (Supplementary Figure 1A). However, only the strongest correlations are reported in the subsequent texts. CSTI, CST\* and *Lactobacillus\_unclassified* correlated positively with acacetin and xanthosine, but negatively with isobutrin and phytate ( $p < 0.05$ ). In contrast, CSTIII, CSTIVA and CSTIVB correlated positively with isobutrin, but negatively with ostruthin, hydroxybupropion, gentamicin, xanthotoxin and bergapten ( $p < 0.05$ ). CSTIVB was also negatively correlated with phloretin ( $p < 0.05$ ) (Supplementary Figure 1A). Furthermore, there were positive correlations between acacetin and *Lactobacillus* species (e.g. *L. crispatus*, *L. acidophilus* etc.), *Lactococcus lactis* subsp. *cremoris* and *C. trachomatis*; while it correlated negatively with *L. iners* AB-1, *F. vaginae* and *Megasphaera*. Xanthosine also correlated with *Lactobacillus* sp., *C. trachomatis*, *S. pneumoniae* and *R. rhizogenes* positively; and negatively with *F. vaginae* and *Megasphaera*. Isobutrin correlated positively with *G. vaginalis*, *F. vaginae*, *Shuttleworthia*, *Megasphaera*, *L. iners* AB-1, *Idiomarina* sp. P7-5-3 and *Lactobacillus* sp. AB5262. It was negatively correlated with *L. psittaci*, *L. helveticus*, *L. crispatus*, *L. acidophilus*, *L. gallinarum* and *C. trachomatis*. There were also weak positive correlations between phloretin and *S. pneumoniae*, *R. rhizogenes*, *L. iners* AB-1, *Lactobacillus* sp. G3\_1\_2M02; which correlated negatively with *F. vaginae*, *Shuttleworthia*, *Megasphaera* and *Idiomarina* sp. P7-5-3. Though weakly, phytate correlated positively with *Shuttleworthia* and *G. vaginalis*, and negatively with *L. crispatus* and other *Lactobacillus* sp. Furthermore, there were negative correlations between xanthotoxin and *Idiomarina* sp. P7-5-3, *G. vaginalis*, *L. iners* AB-1, *F. vaginae*, *Megasphaera* and *S. pneumoniae*; and weak positive correlations with *Shuttleworthia*, *C. trachomatis* and *Lactobacillus* sp. including *L. crispatus* (Supplementary Figure 1C). With an adjusted FC threshold of  $\pm 0.5$ , the chemokines/cytokines showed some significant correlations with the microbiota and only the strongest correlations were emphasised (Supplementary Figure 2). That is, at GTP1, CSTI and CSTIII correlated negatively with CXCL9, CXCL10 and TNFR1, whereas CSTIVB and to a lesser extent CSTIVA and CST\* correlated positively with all 3 inflammatory mediators (Supplementary Figure 2A). Similar to the correlations with CSTs (Supplementary Figure 2C), CXCL9, CXCL10 and TNFR1 positively correlated with *Shuttleworthia* only; and negatively with the *Lactobacillus* species, *L. lactis*, and other anaerobes such as *G. vaginalis*, *F. vaginae*, *Megasphaera*, *S. pneumoniae*, *R. rhizogenes*, *Idiomarina* sp. P7-5-3 and *C. trachomatis*. The inflammatory mediators also showed mild negative correlation with *S. sanguinegens*, *Dialister*, *Aerococcus*, *Parvimonas Coriobacteriales bacterium* DNF00809, *Clostridiales bacterium* KA00274 and *Streptomyces rameus*. There were mild positive correlations between CXCL10, TNFR1 and isobutrin; and between CXCL9, CXCL10 and ostruthin. The chemokines/cytokines correlated negatively with the other metabolites (Supplementary Figure 2E).

### **Correlation of microbiota, metabolite and chemokine/cytokine profiles at GTP2**

CSTI correlated positively with dhurrin and zierin, and negatively with heparin and androsterone ( $p < 0.05$ ) (Supplementary Figure 2B). While CSTV correlated positively with pantetheine and negatively with androsterone, dhurrin, zierin and heparin ( $p < 0.05$ ). CST\* correlated positively with heparin and to a lesser extent with androsterone, dhurrin, zierin and pantetheine ( $p < 0.05$ ). CSTIVA negatively correlated with heparin, pantetheine and androsterone ( $p < 0.05$ ) (Supplementary Figure 1B). There were notable positive correlations between pantetheine and *L. jensenii*, *Idiomarina* sp. P7-5-3, *L. acidophilus*, *L. crispatus*; and negative correlation with *Bifidobacterium*. The cyanogenic glycosides i.e. dhurrin and zierin correlated positively with *Coriobacteriales bacterium* DNF00809, *C. trachomatis*, *L. acidophilus*, *L. crispatus*, *R. rhizogenes*; and negatively with *Bifidobacterium*, *S. pneumoniae* and *L. lactis* subsp. *cremoris*. Heparin strongly correlated with *L. acidophilus* positively. There were positive correlations between androsterone and *Idiomarina* sp. P7-5-3 and *L. acidophilus*; and negative correlations with *L. jensenii*, *L. lactis* subsp. *cremoris*, *S. pneumoniae*, *R. rhizogenes* and *C. trachomatis* (Supplementary Figure 1D). CSTI correlated positively with CXCL10 and negatively with CXCL9, and TNFR1; whereas CST\* correlated positively with TNFR1 and negatively with CXCL10. CSTIVA and CSTIVB also correlated negatively with TNFR1 and CXCL9. CSTIII correlated negatively with all three inflammatory mediators; whereas CSTV correlated negatively with CXCL9 and TNFR1 and mildly positively with CXCL10 (Supplementary Figure 2B). CXCL10 showed a strong negative correlation with *L. acidophilus*,

and mild positive correlations with *C. trachomatis*, *Coriobacteriales bacterium* DNF00809, *Idiomarina* sp. P7-5-3, *L. crispatus*, *L. jensenii*, *L. psittaci* and *R. rhizogenes*. CXCL10 also had mild negative correlations with *L. iners* AB-1, *L. lactis*, *S. pneumoniae*, *Finnegoldia* and *Bifidobacterium*. By contrast to CXCL10, TNFR1 had a strong positive correlation with *L. acidophilus* and mildly with *L. psittaci*, while CXCL9 only had a mild positive correlation with *L. psittaci* (Supplementary Figure 2D). CXCL9 and CXCL10 showed strong positive correlation with androsterone and weakly correlated with pantetheine. On the other hand, TNFR1 showed strong negative correlation with dhurrin, pantetheine and zierin ( $p < 0.05$ ) (Supplementary Figure 2F).

#### **Correlation of microbiota, metabolite and chemokine/cytokine profiles GTP1 vs. GTP2**

A total of 28 CV fluid samples (GTP1 = 14 vs. GTP2 = 14) had both microbiota and metabolome data. We observed some correlations between the CSTs and most abundant metabolites. However, only the strongest correlations are reported in the subsequent texts. In the combined sample population, 5,6,7,8-tetrahydropteridine and 8-hydroxypurine correlated positively with CSTIII and negatively with CSTI, CST\* and CSTV. CSTV was also negatively correlated with 1-5-phospho-D-ribosyl-5-amino-4-imidazolecarboxylate. There were also significant correlations between the dominant bacterial species and metabolite. Notably, *Lactobacillus* sp. AB5262, *F. vaginae*, *A. minutum* and to a lesser extent *L. iners* AB-1, *Idiomarina* sp. P7-5-3, *G. vaginalis* and *Firmicutes bacterium* positively correlated with 5,6,7,8-tetrahydropteridine and 8-Hydroxypurine; and negatively with *L. crispatus* and *L. jensenii*. Both *L. crispatus* and *L. jensenii* also negatively correlated with NAD and 1-(5-Phospho-D-ribosyl)-5-amino-4-imidazolecarboxylate. Furthermore, *Shuttleworthia* and to a lesser extent *Aerococcus*, *Lactobacillus* sp. AB5262 and *Lactobacillus* sp. MWBPC 1-3-1 correlated positively with N,N-dimethylaniline. In the combined sample population ( $n = 93$ ), CSTIII, CSTIVB and to a lesser extent CSTIVA correlated positively with CXCL9 and CXCL10, while CSTI, CSTIII, CSTV and CST\* correlated negatively with TNFR1.

The chemokines/cytokines showed some significant correlations with the bacterial species when both GTP1 ( $n = 14$ ) and GTP2 ( $n = 14$ ) samples were combined. CXCL10 strongly correlated positively with *Shuttleworthia* and weakly with *L. iners* AB-1, *S. pneumoniae* and *Firmicutes bacterium*. CXCL9 showed similar positive correlations with the bacterial species. Both CXCL9 and CXCL10 correlated negatively with *L. crispatus*, *L. jensenii*, *L. helveticus*, *L. psittaci*, *L. lactis* subsp. *cremoris*, *G. vaginalis*, *C. trachomatis*, *F. vaginae*, *A. minutum*, *Megasphaera*, *Aerococcus* and *Idiomarina* sp. P7-5-3. TNFR1 was only mildly positively correlated with *Shuttleworthia* and *R. rhizogenes*; but correlated negatively with *L. iners* AB-1, *L. crispatus*, *L. jensenii*, *L. helveticus*, *L. psittaci*, *L. lactis* subsp. *cremoris*, *G. vaginalis*, *C. trachomatis*, *F. vaginae*, *A. minutum*, *Megasphaera*, *Idiomarina* sp. P7-5-3, *Coriobacteriales bacterium* DNF00809, *Tissierella bacterium*, *Aerococcus* and *Firmicutes bacterium*. In the combined sample population, only TNFR1 and NAD correlated positively.

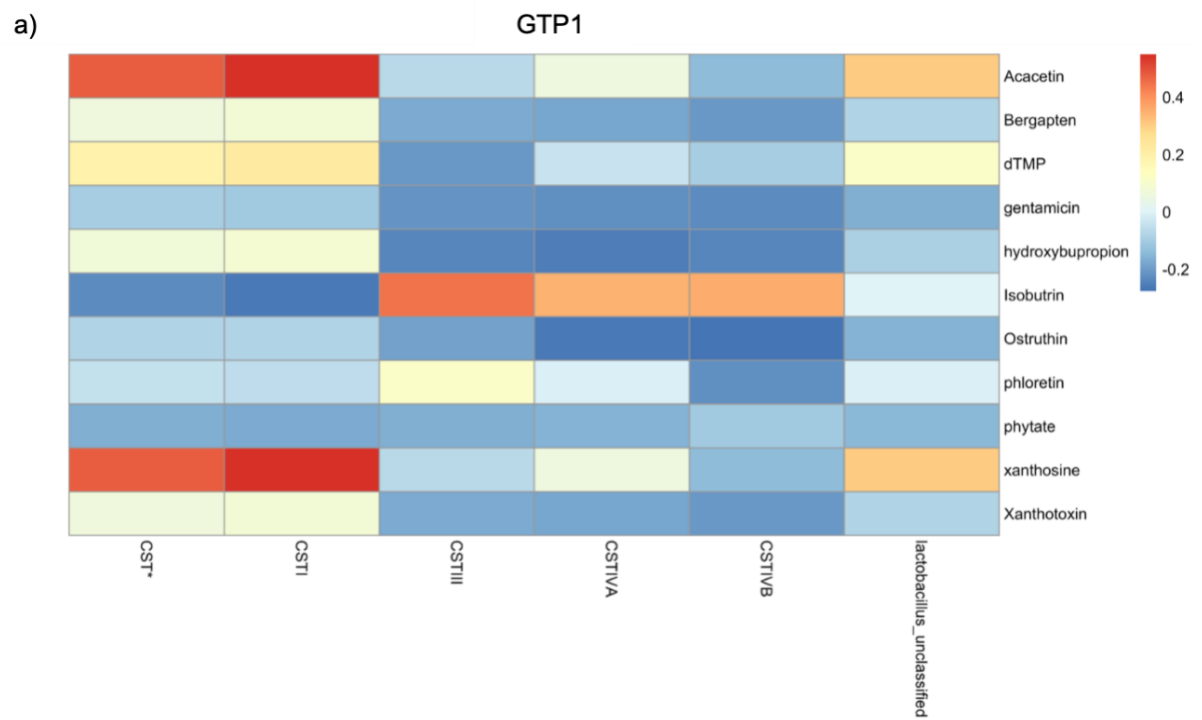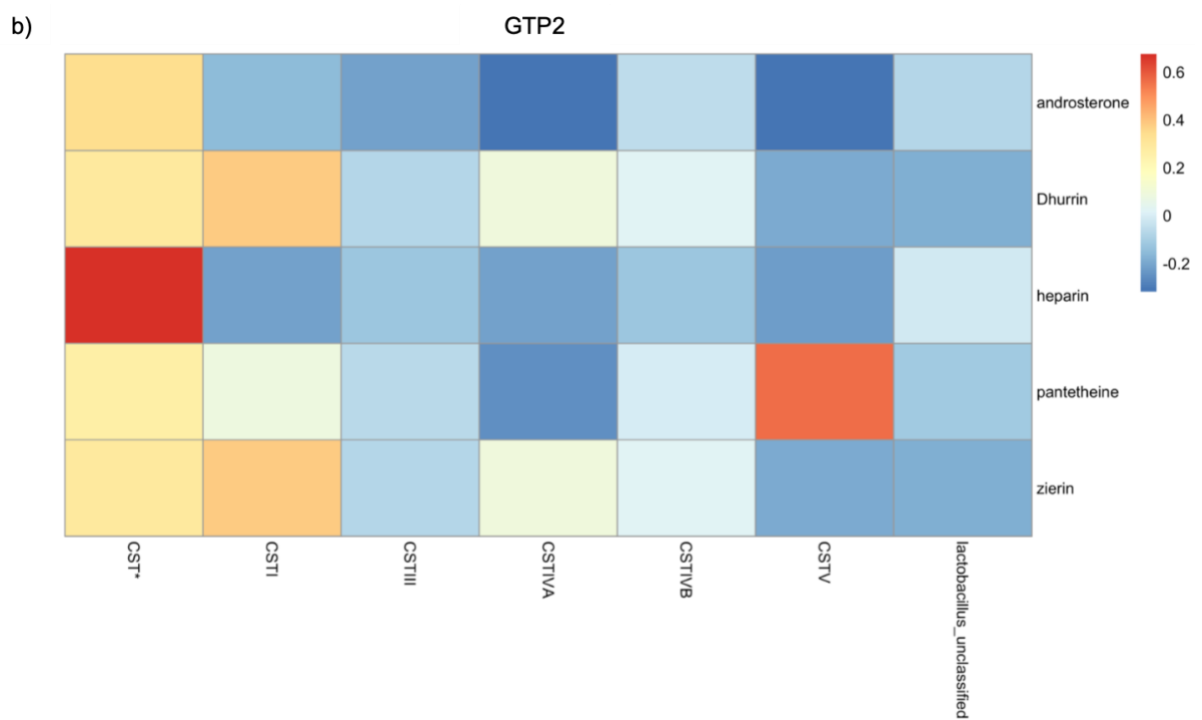



c)

GTP1

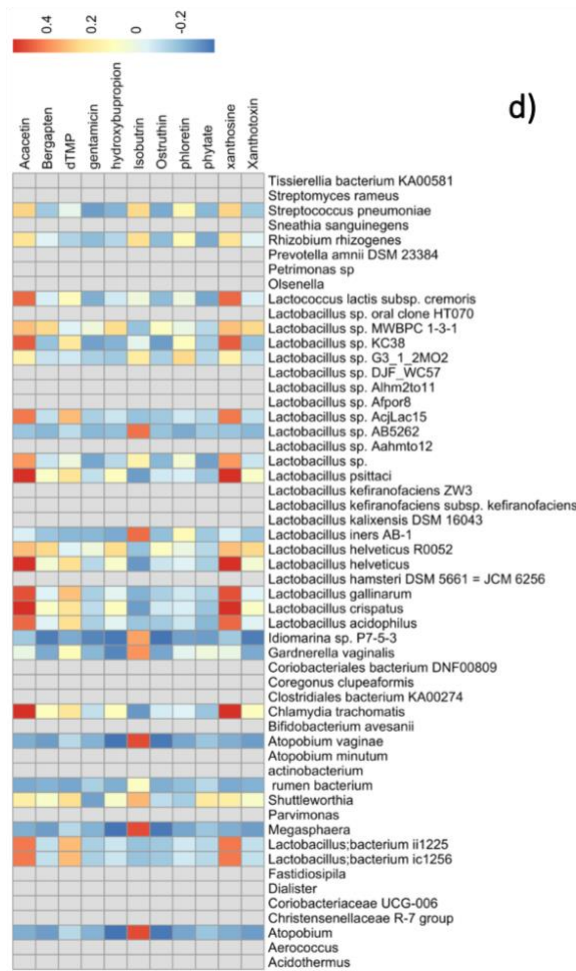

d)

GTP2

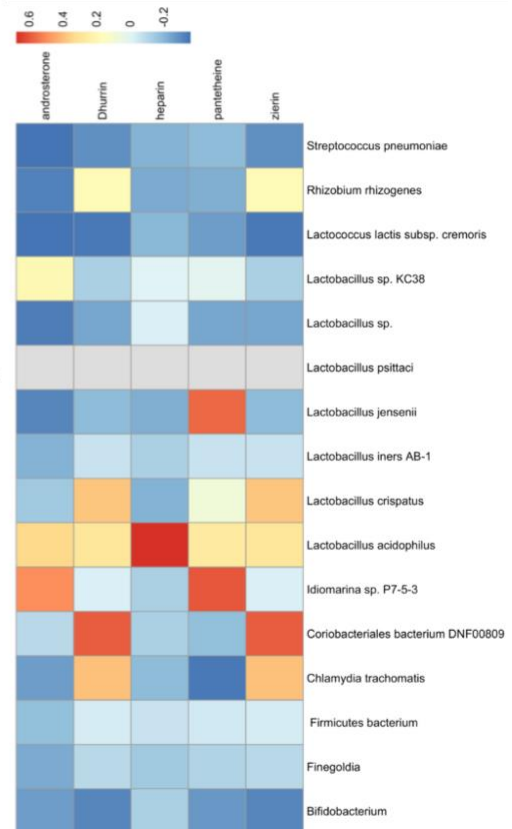

**Supplementary Figure 1.** Correlations between cervicovaginal fluid metabolites and microbiota according to gestational time points. (A-B) community state types (CSTs); (C-D) bacterial taxa. GTP1 - 20-22 weeks (n = 13); GTP2 - 26-28 weeks (n = 15). Pearson's correlation coefficients ( $r$ , colour) range from -1 (dark blue) to +1 (dark red). Only correlations with  $P$  values < 0.05 are represented. *GTP*, gestational time point.

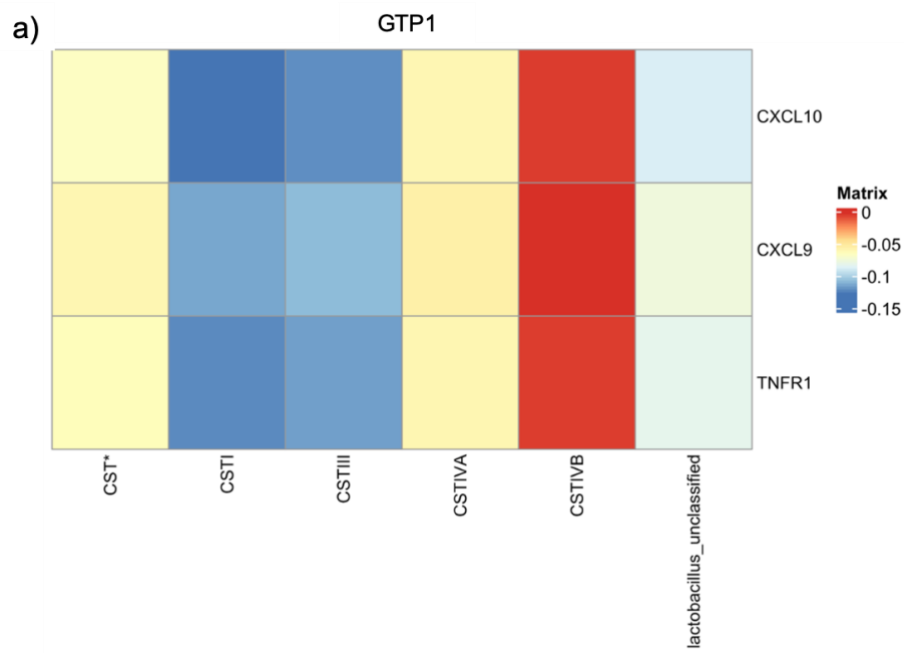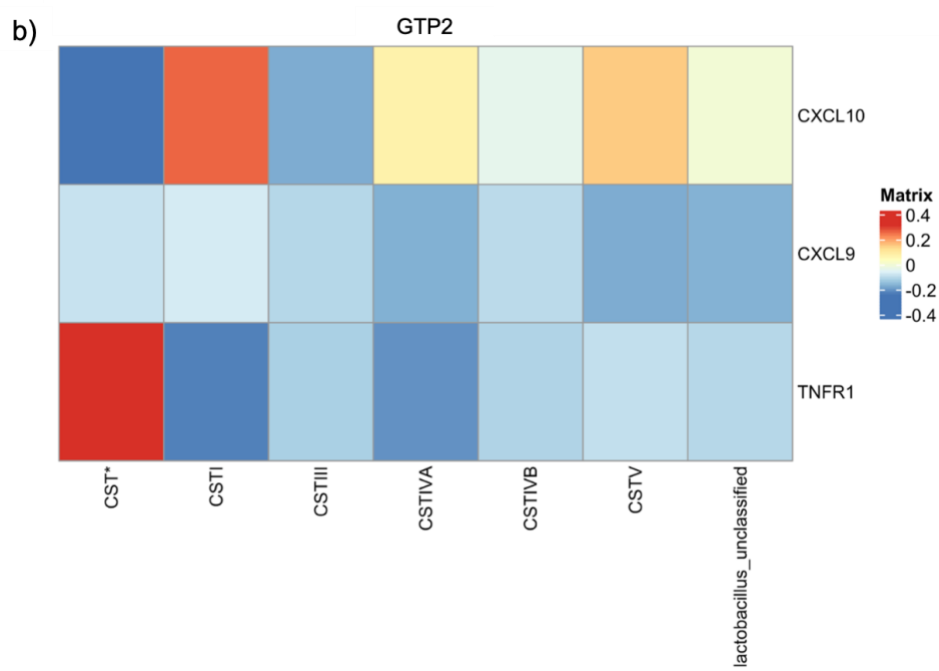



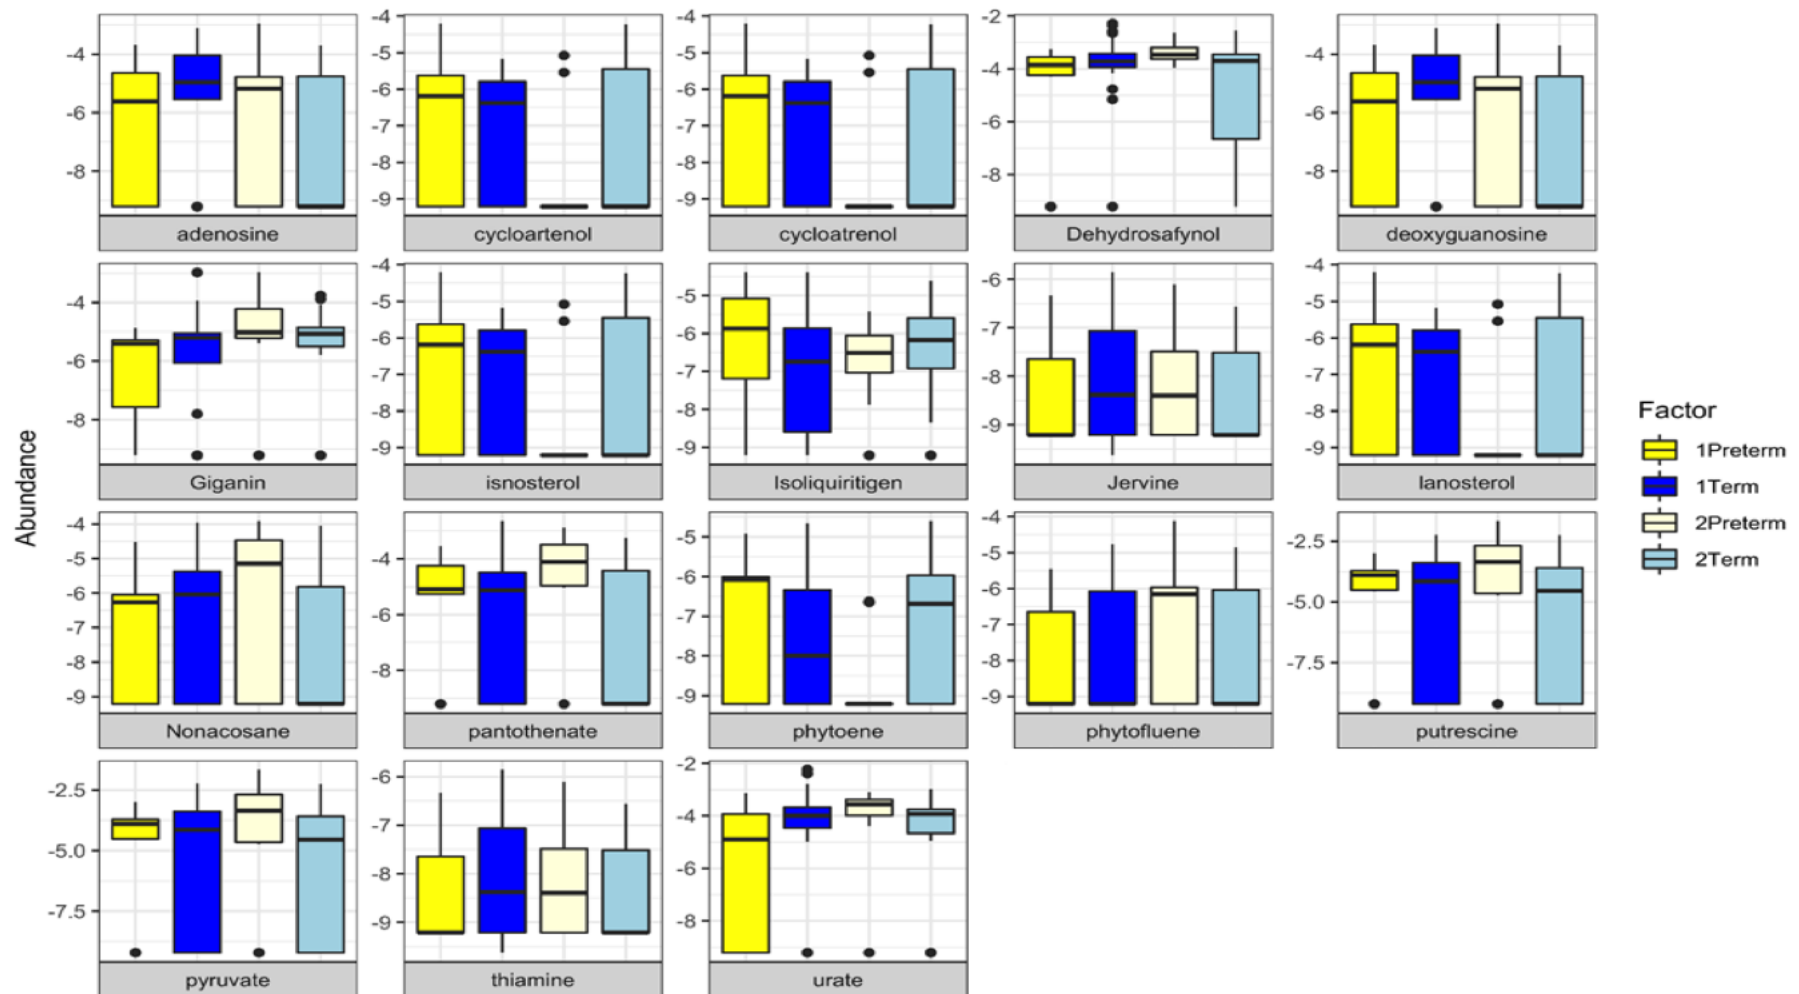

**Supplementary Figure 3.** Comparison of cervicovaginal metabolite changes across gestational age (GTP1 to GTP2) in preterm-delivered and term-delivered women by ANOVA. GTP1: 20-22 weeks; GTP2: 26-28 weeks; *GTP*, gestational time point.
